# Supplementary material for: Oligomers matrix-assisted dispersion of high content of carbon nanotubes into monolithic column for online separation and enrichment of proteins from complex biological samples
Source: Royal Society of Chemistry journal article supplement (doi:10.1039/c3an00951c), 2013-01-01
Supplement: c3an00951c.pdf [file c3an00951c.pdf]

# **Oligomers Matrix-Assisted Dispersion of High Content of Carbon Nanotubes Into Monolithic Column for Online Separation and Enrichment of Proteins from Complex Biological Samples**

*Chanyuan Zhou<sup>1</sup>, Zhuo Du<sup>1\*</sup>, Gongke Li<sup>1\*</sup>, Yukui Zhang<sup>2</sup>, Zongwei Cai<sup>3</sup>*

*1. School of Chemistry and Chemical Engineering, Sun Yat-sen University, Guangzhou, 510275, China*

*2. Dalian Institute of Chemical Physics, Chinese Academy of Sciences, Dalian 116011, China*

*3. Department of Chemistry, Hong Kong Baptist University, Kowloon Tong, Hong Kong, China*

Corresponding authors: Gongke Li, Zhuo Du

Tel.: +86 2084110922;

Fax: +86 2084115107.

E-mail: cesgkl@mail.sysu.edu.cn (G.Li)

duzh@mail.sysu.edu.cn (Z.Du)

## Supporting information

### Supplement of experimental section

**Oxidative Treatment of MWNTs.** MWNTs were treated with an acid oxidative method. In a typical procedure, approximately 0.1 g of purified MWNTs were suspended in 50 mL of a 3:1 mixture of concentrated H<sub>2</sub>SO<sub>4</sub> (98 wt%)/HNO<sub>3</sub>(97 wt%) and refluxed in a water bath at 60 °C for 5 h. The solid was collected on a 100-nm-pore membrane filter and rinsed with deionized water until the pH of the filtrate was 7.

**Dynamic Binding Capacity.** The dynamic binding capacity (DBC) was calculated by the equation (1) :

$$DBC = C_0(V - V_0)/V_C \quad (1)$$

where  $C_0$  is the protein concentration (mg/L),  $V$  is the volume of protein solution pumped into the column at 50% breakthrough (mL),  $V_0$  is the dead volume (mL), and  $V_C$  is the total column volume of the monolith (mL). In brief, the monolith was equilibrated with a loading buffer. After equilibration, elution of protein and regeneration of the monolith were carried out with the elution buffer.

## Supplement of Figures

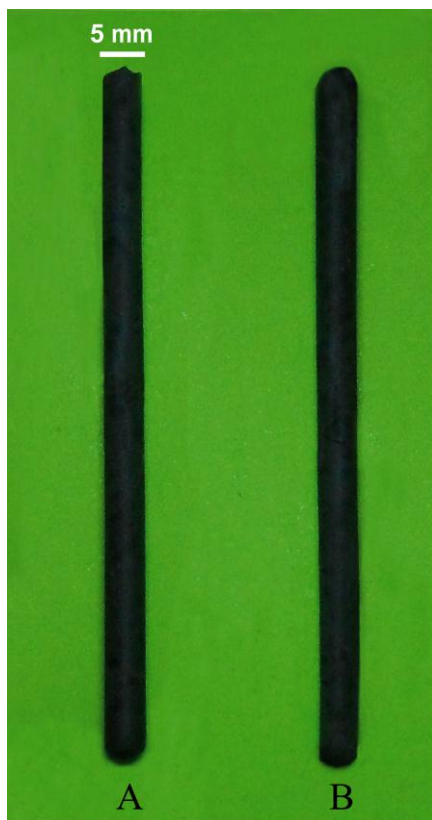

**Figure S-1.** Photograph images of OMAD-MMC with different MWNTs weight ratios: (A) 3 wt%, (B) 5 wt%.

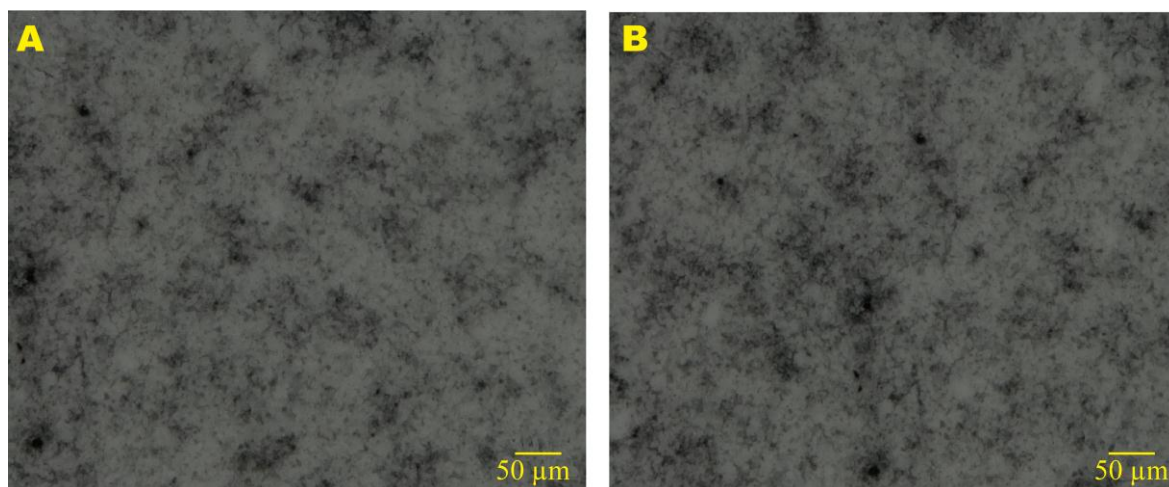

**Figure S-2.** Optical microscope image showing an overall morphology of a cross-section of OMAD-MMC with different MWNTs weight ratios: (a) 3 wt%, (b) 5 wt%.

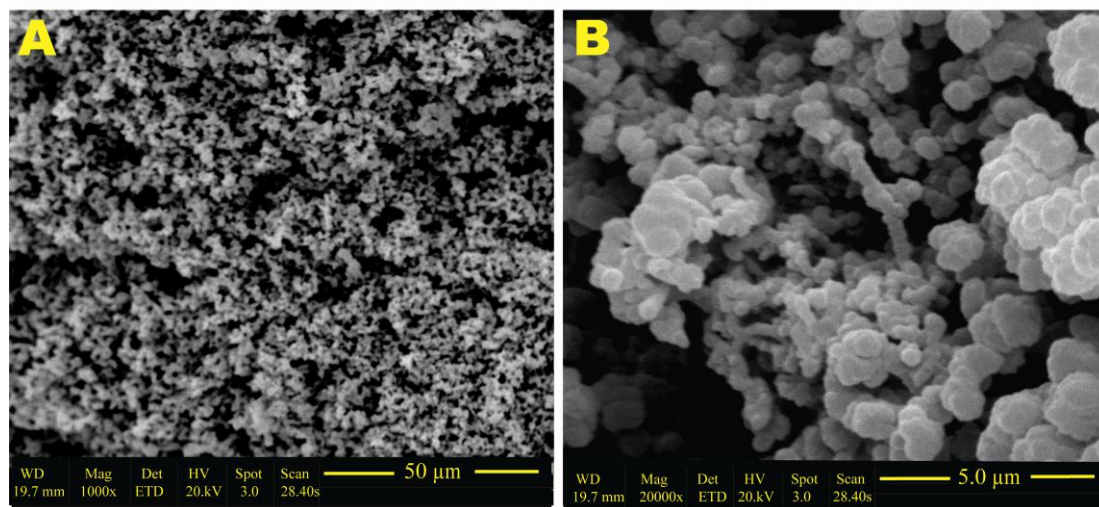

**Figure S-3.** Scanning electron micrographs of OMAD-MMC at magnifications of (A) 1000× and (B) 20000×.

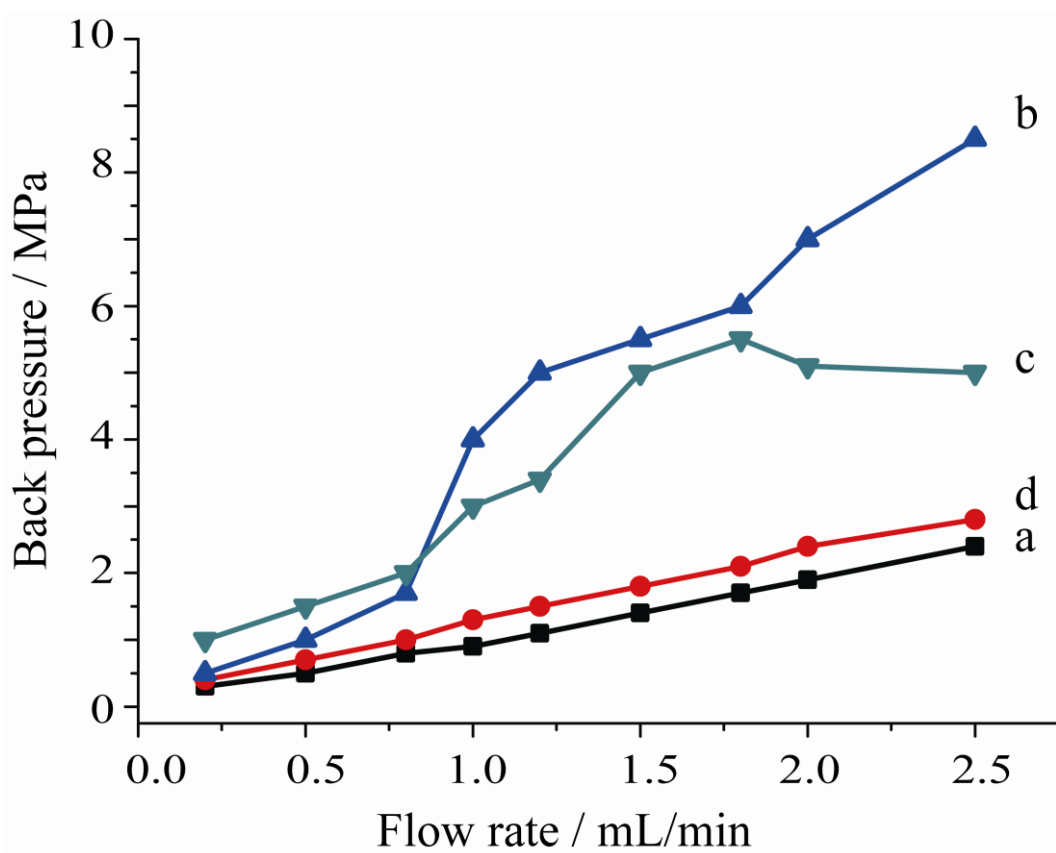

**Figure S-4.** Linear velocity and back-pressure drop on monolithic column. (a) PMC, (b) MMC-0, (c) MMC-10 and (d) OMAD-MMC. (column size: 100 mm×2.1 mm i.d.)

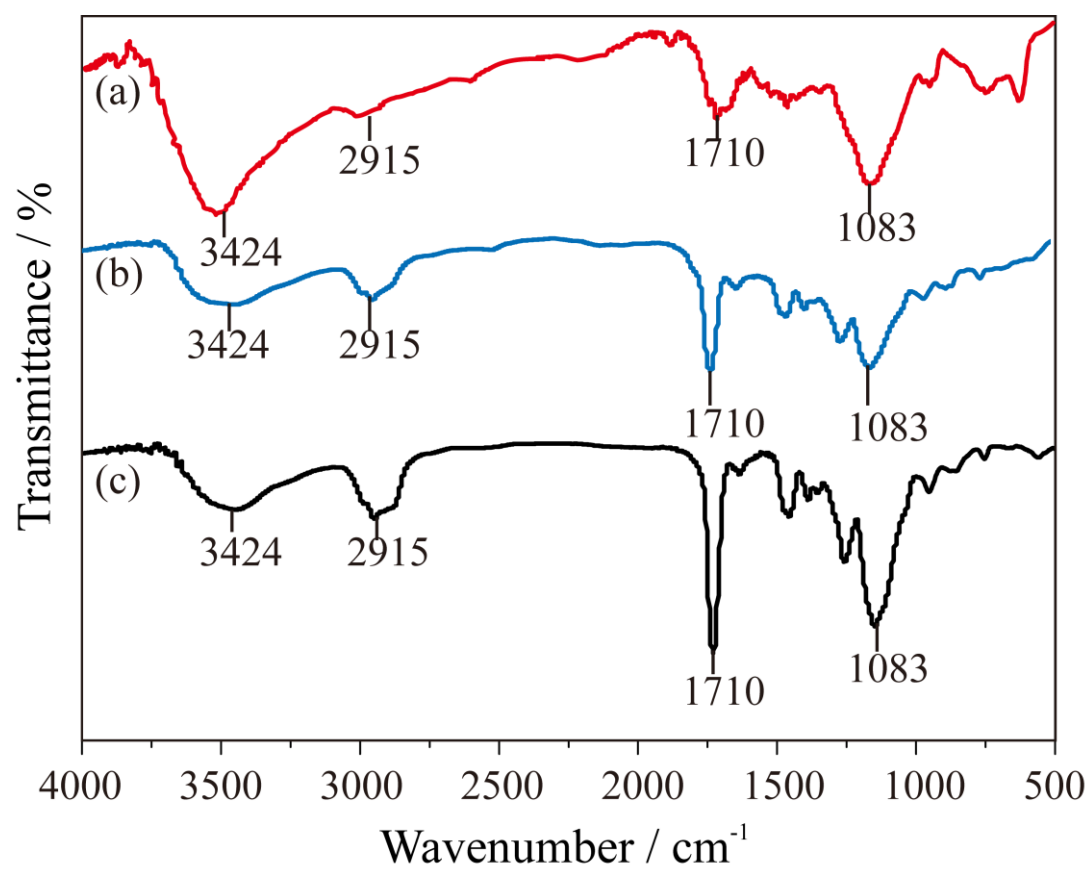

**Figure S-5.** Comparison of FT-IR spectra of (a) c-MWNTs, (b) PMC and (c) OMAD-MMC.

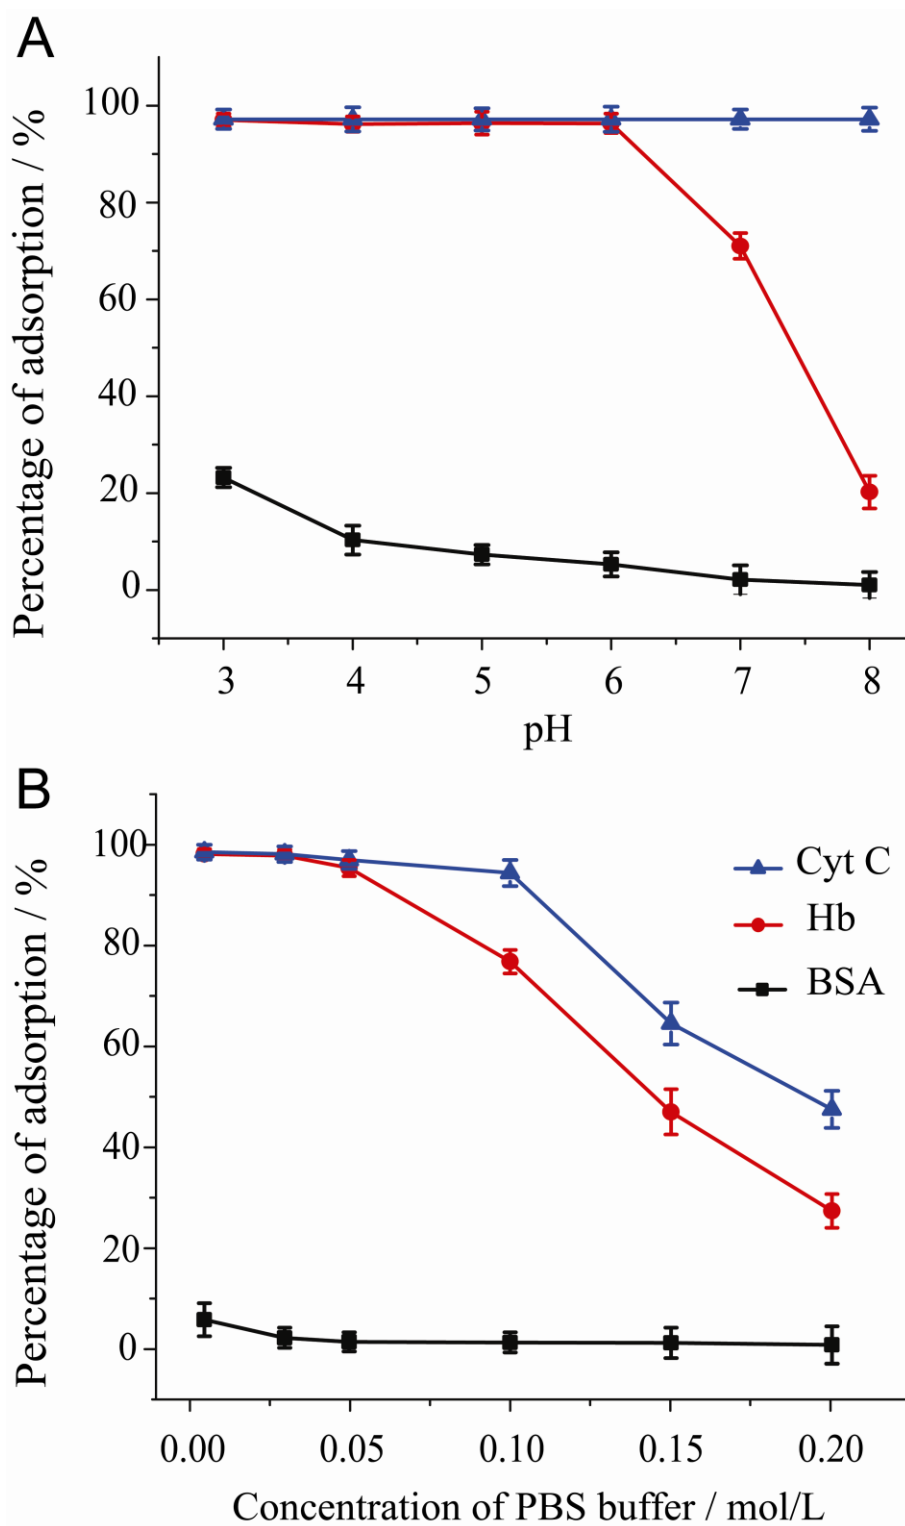

**Figure S-6.** Effect of pH value (A) and ionic strength (B) on adsorption of Hb, Cyt C and BSA. Sampling volume: 2 mL; Eluent Volumes: 500  $\mu$ L; Flow rate: 20  $\mu$ L/s ; Concentration of proteins in the original solution: 10  $\mu$ g/mL. (Hb and Cyt C were detected at 406 nm, while BSA was detected at 208 nm); Errors bars show the standard deviation of the mean (n = 3).



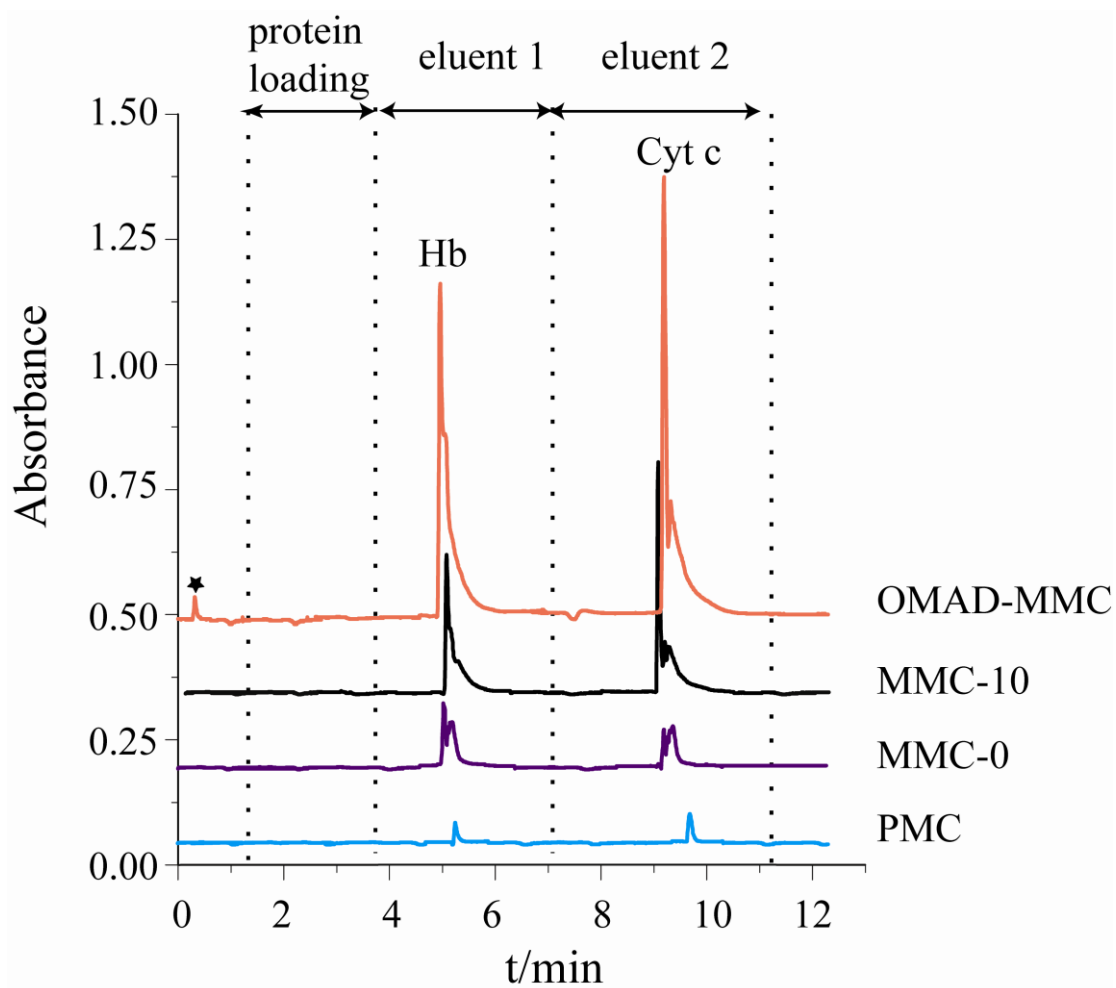

**Figure S-7.** Comparison of OMAD-MMC with MMC-0, MMC-10 and PMC for the selective adsorption of basic proteins from model protein mixtures. The peak marked with an asterisk is attributable to the original sample solution containing Hb and Cyt C without pretreatment. Experimental conditions: loading buffer: phosphate buffer (0.025 mol/L, pH 6); Eluent 1: pH 8.0, 0.1 mol/L PBS; Eluent 2: pH 11.0, 1 mol/L ammonium sulfate; Sampling volume: 2 mL; Eluent Volumes: 500  $\mu$ L; Flow rate: 20  $\mu$ L/s ; Detection wavelength: 406 nm; monolithic columns: 100 mm $\times$ 2.1 mm i.d..

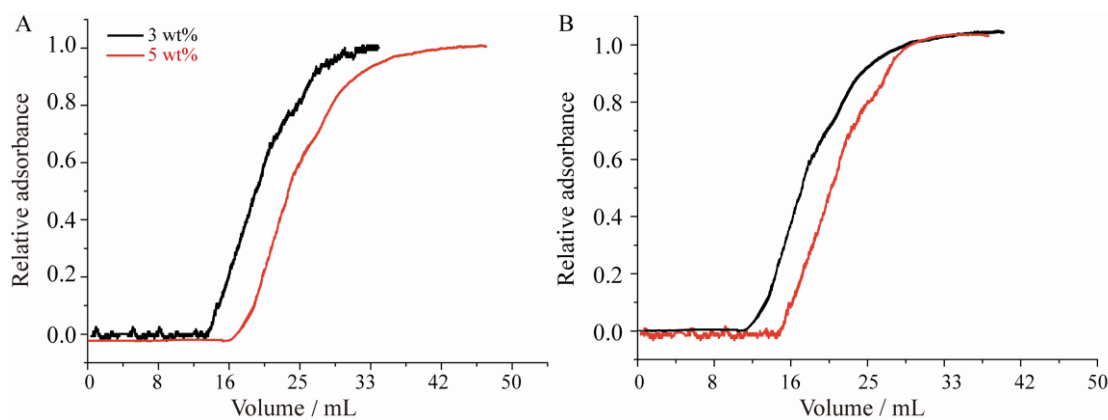

**Figure S-8.** Breakthrough curves of hemoglobin (A) and cytochrome c (B) demonstrating the effect of the content of MWNTs in the polymer matrix on loading capacity of OMAD-MMC. Conditions: monolithic columns 100 mm×2.1 mm i.d.; carrier solution: 0.025 mol/L phosphate buffer (pH 6.0); flow rate: 1mL/min; concentration of hemoglobin and cytochrome c solution: 0.1 mg/mL; detection wavelength, 406 nm.
